# Supplementary material
Source: HighWire-hosted journal article supplement (http://thorax.bmjjournals.com/highwire/filestream/174298/field_highwire_adjunct_files/0/59294Figs1to14.pdf)

Fig S1: A comparison of the effects of personal best PEF vs % predicted action points on hospitalisations for asthma

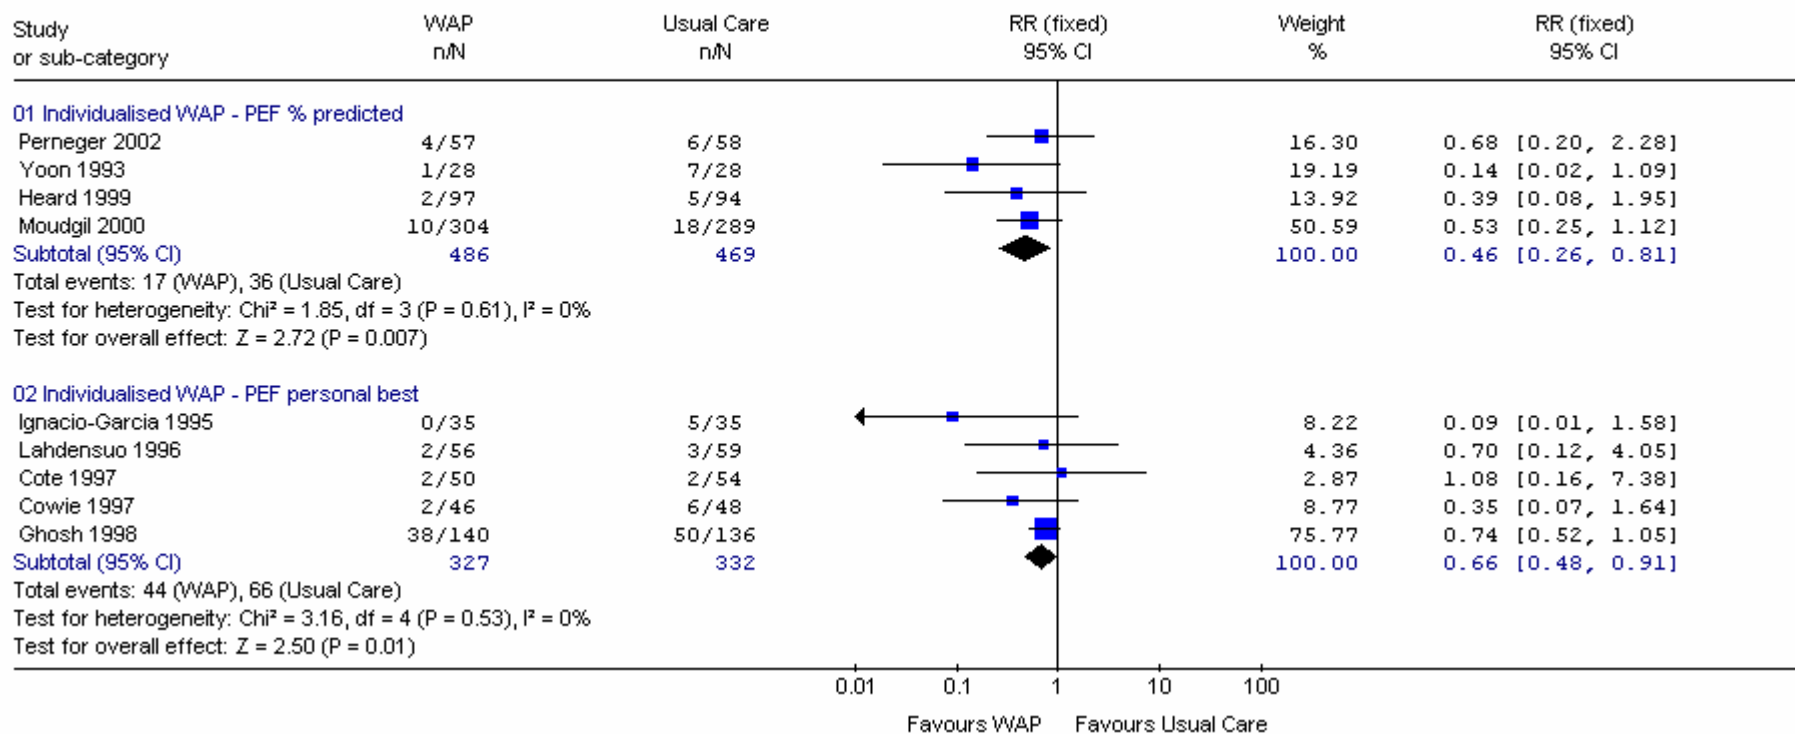

Fig S2: A comparison of the effects of personal best PEF vs % predicted action points on ER visits for asthma

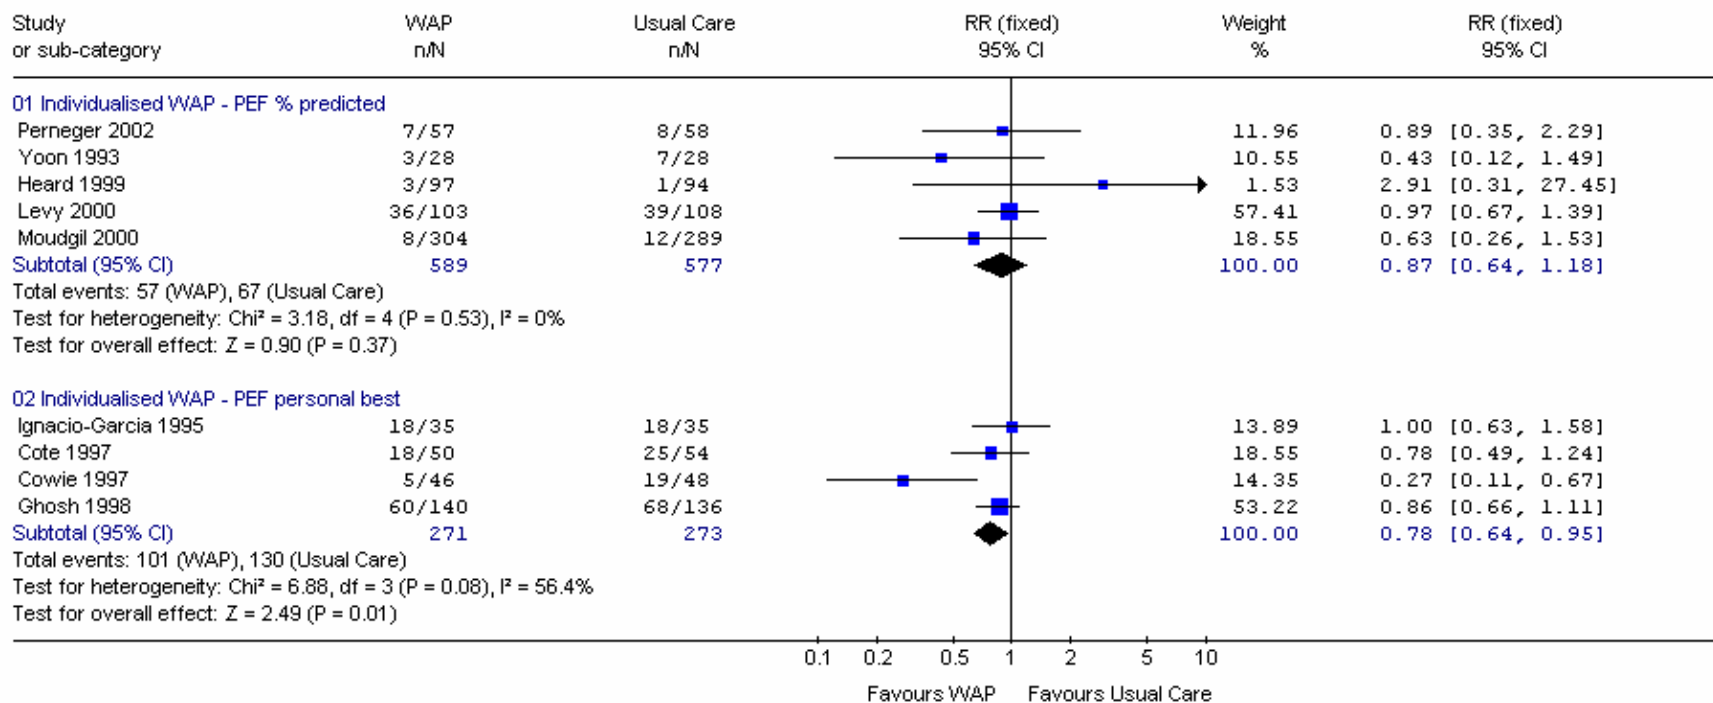

Fig S3: A comparison of the effects of personal best PEF vs % predicted action points on days off work for asthma

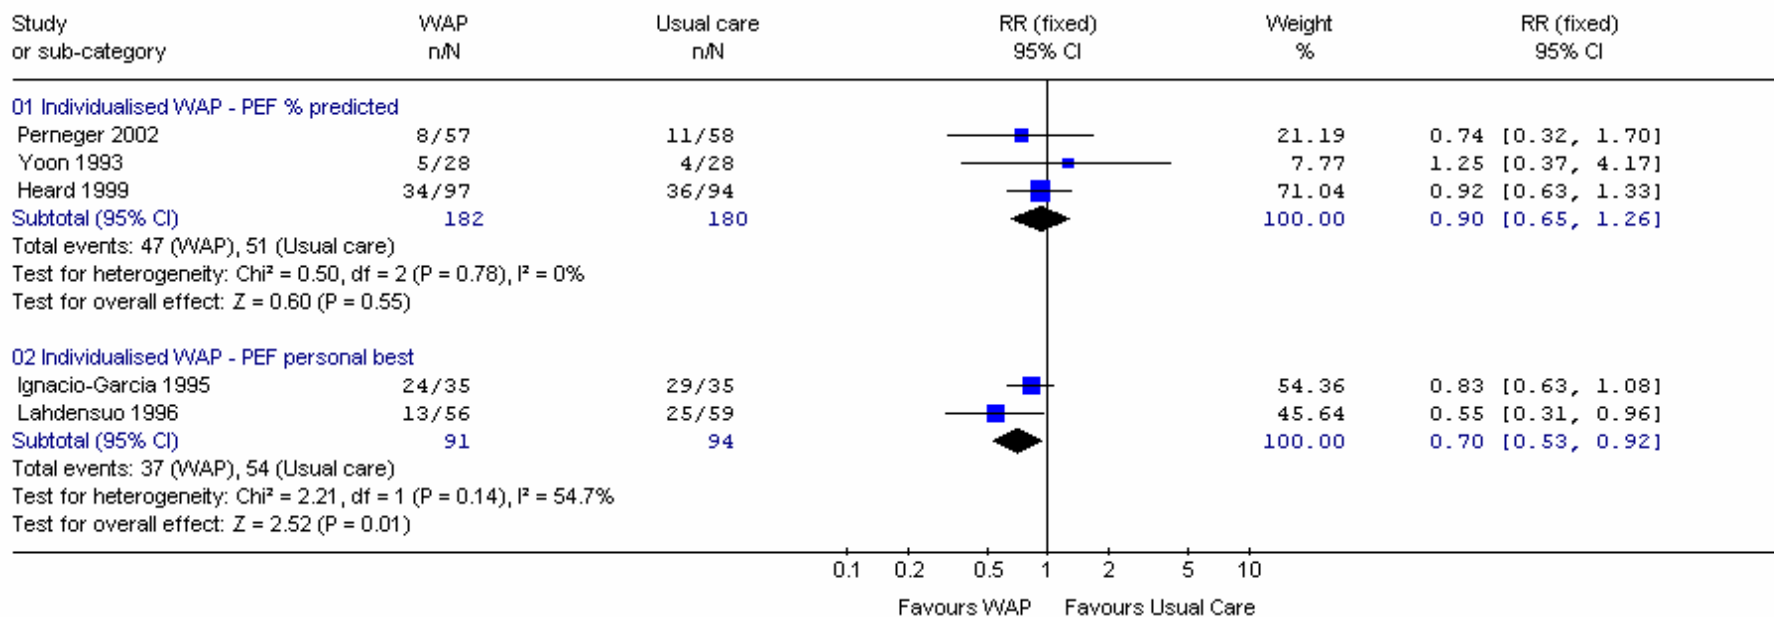

Fig S4: A comparison of the effects of personal best PEF vs % predicted action points on PEF (mean) for asthma

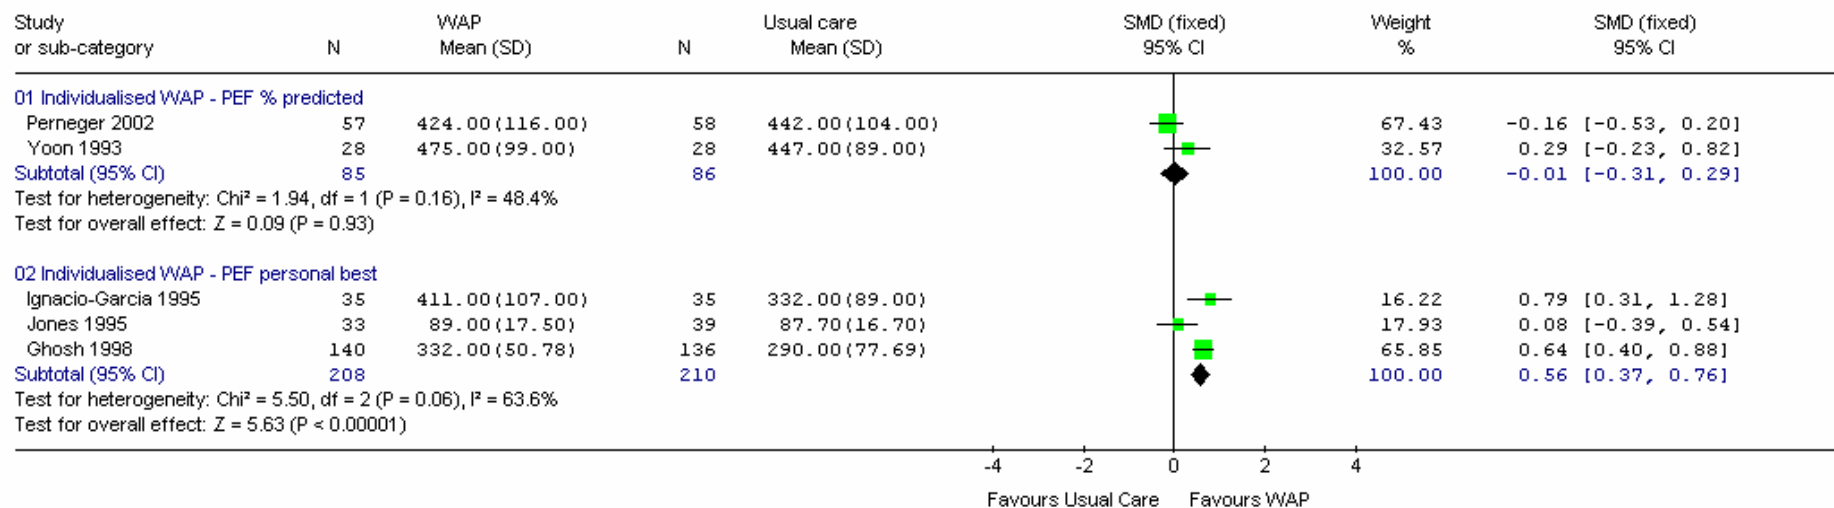

Fig S5: A comparison of the number of action points in written action plans on the outcome of hospitalisations

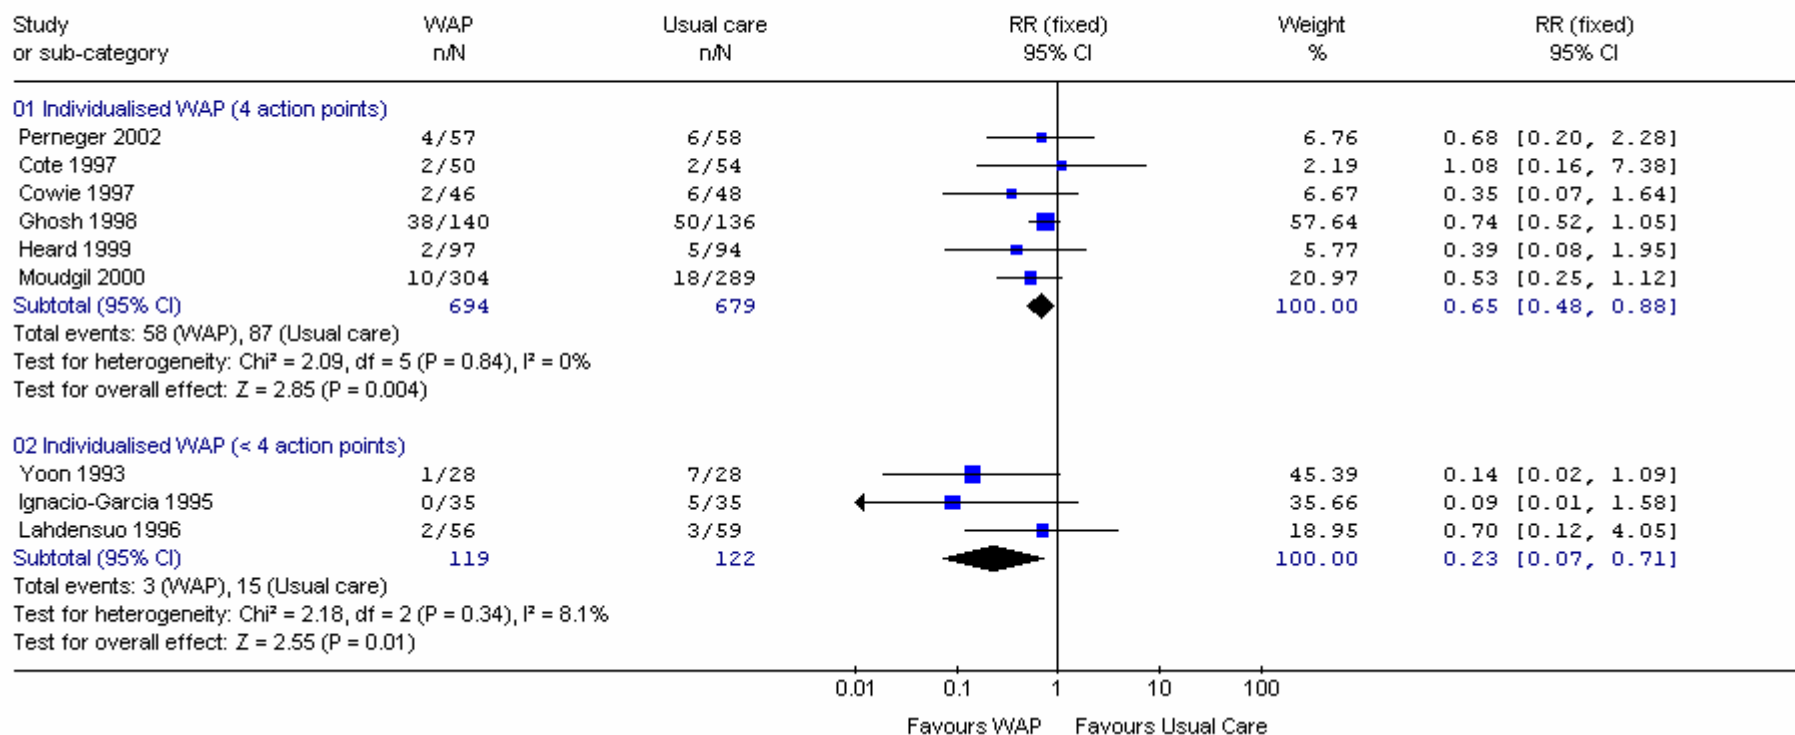

Fig S6: A comparison of the number of action points in written action plans on the outcome of ER visits

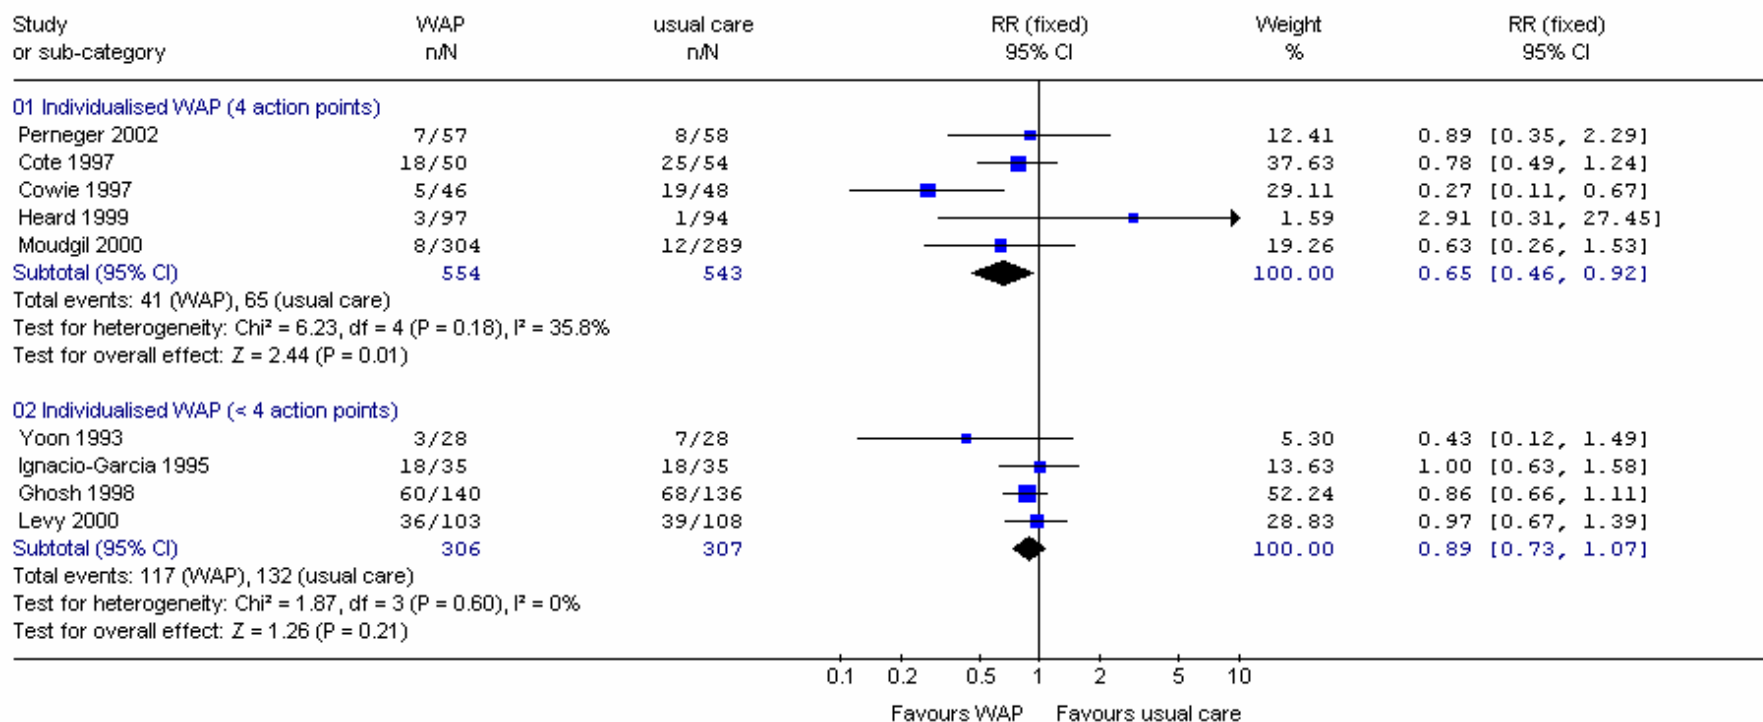

Fig S7: A comparison of the number of action points in written action plans on the outcome of PEF (mean)

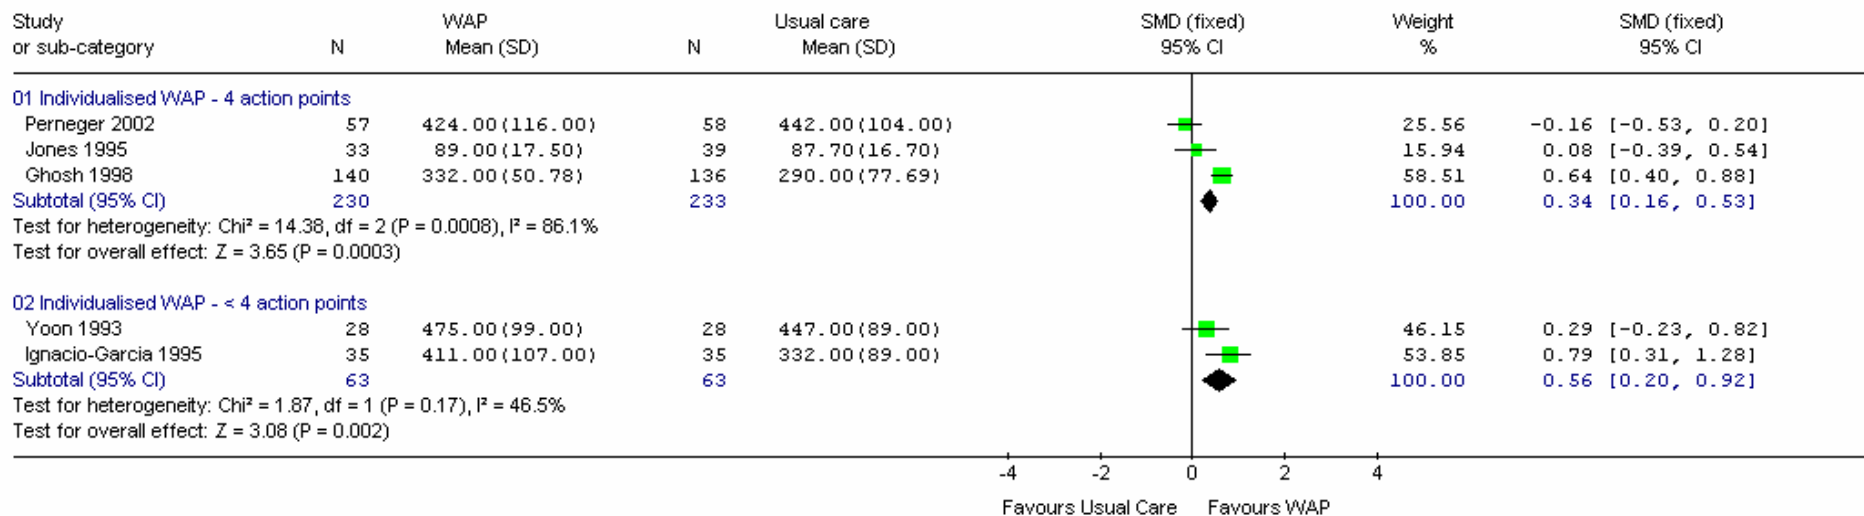

Fig S8: A comparison of action plan presentations (traffic light vs other) on the outcome hospitalisations

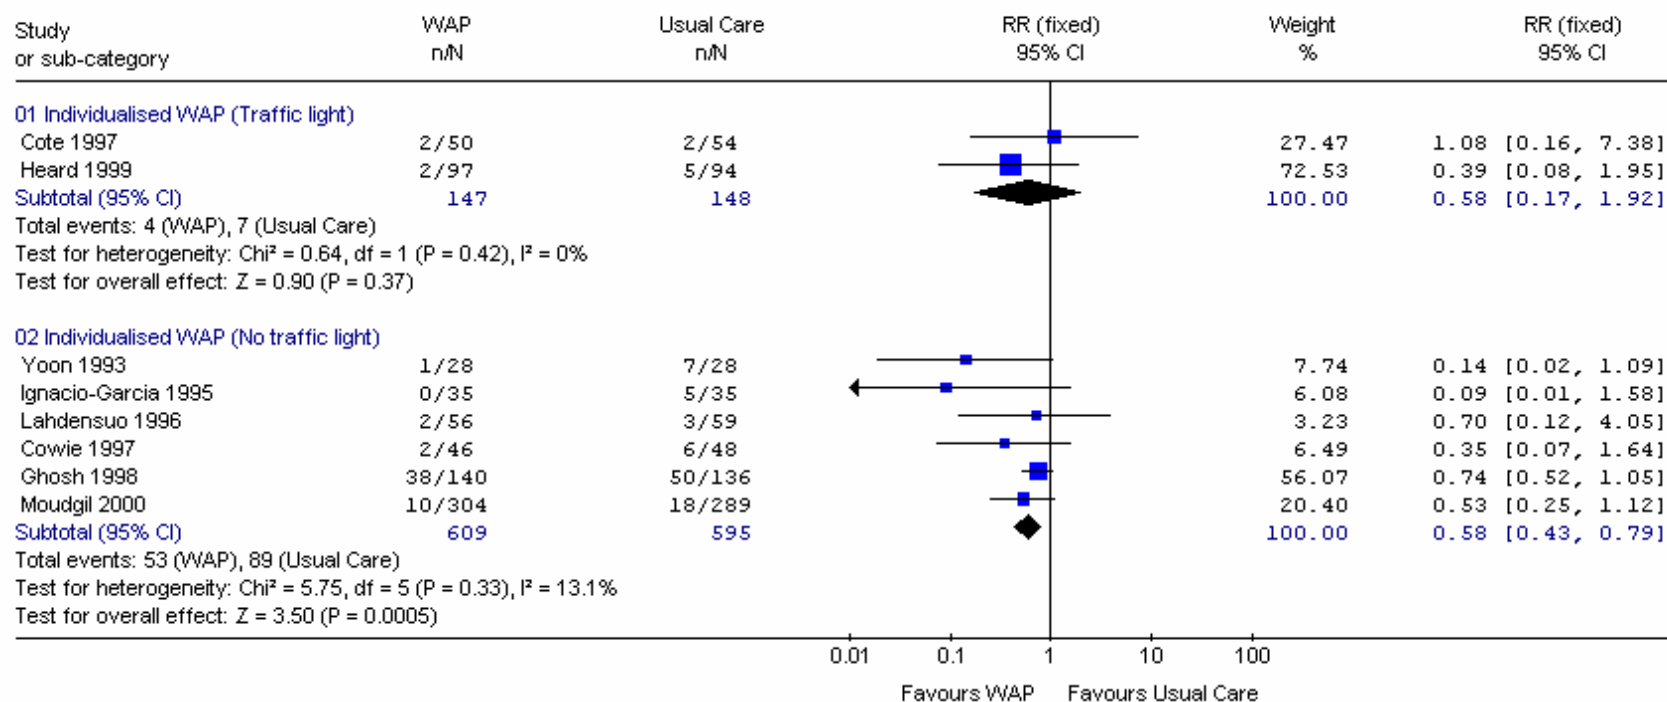



Fig S9: A comparison of action plan presentations (traffic light vs other) on the outcome ER visits

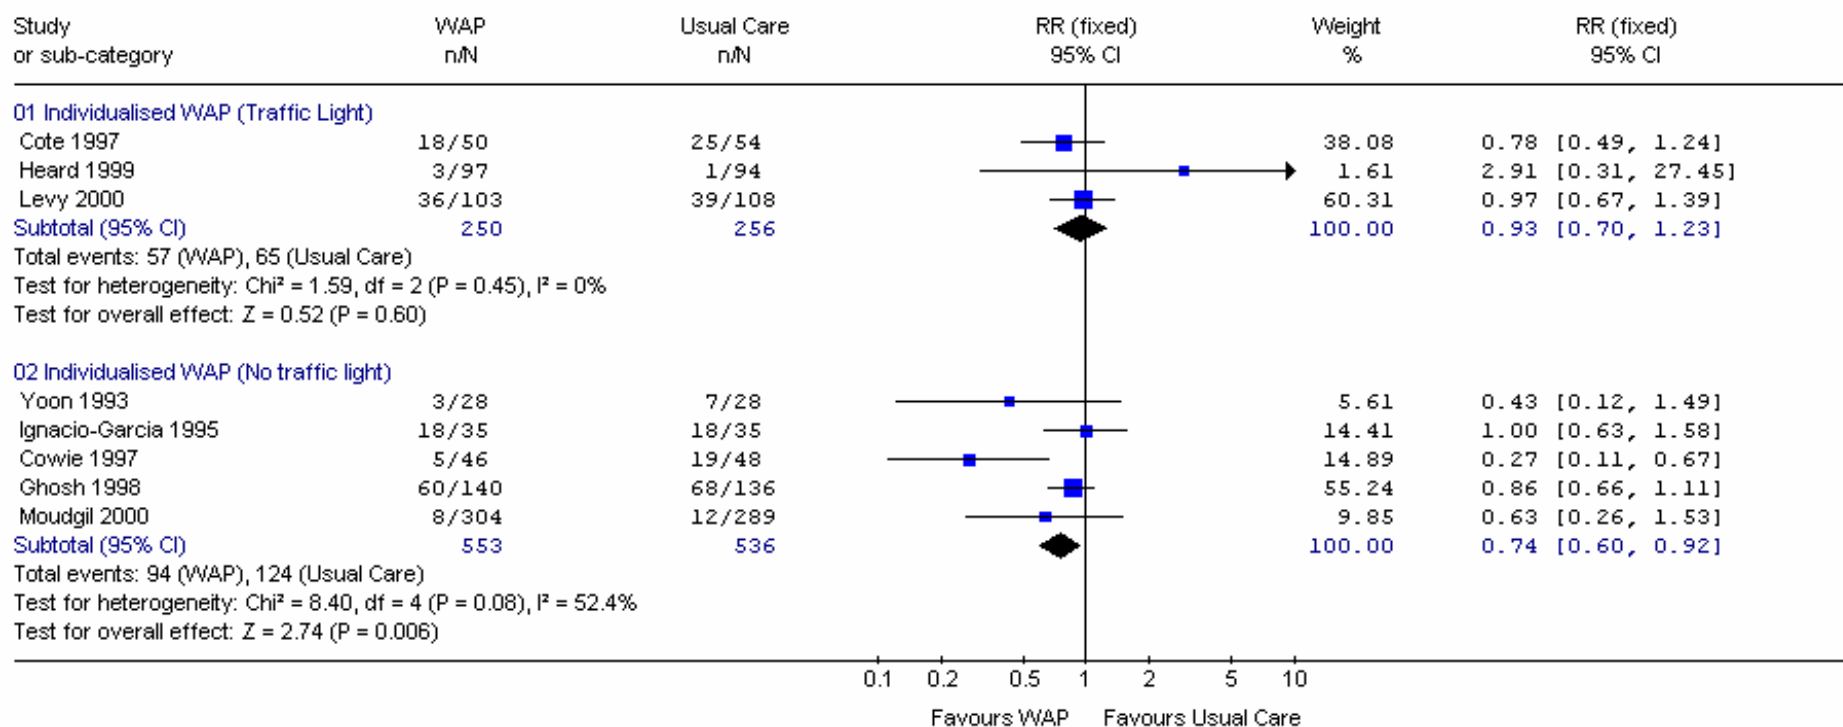

Fig S10: A comparison of action plan presentations (traffic light vs other) on the outcome unscheduled Dr visits

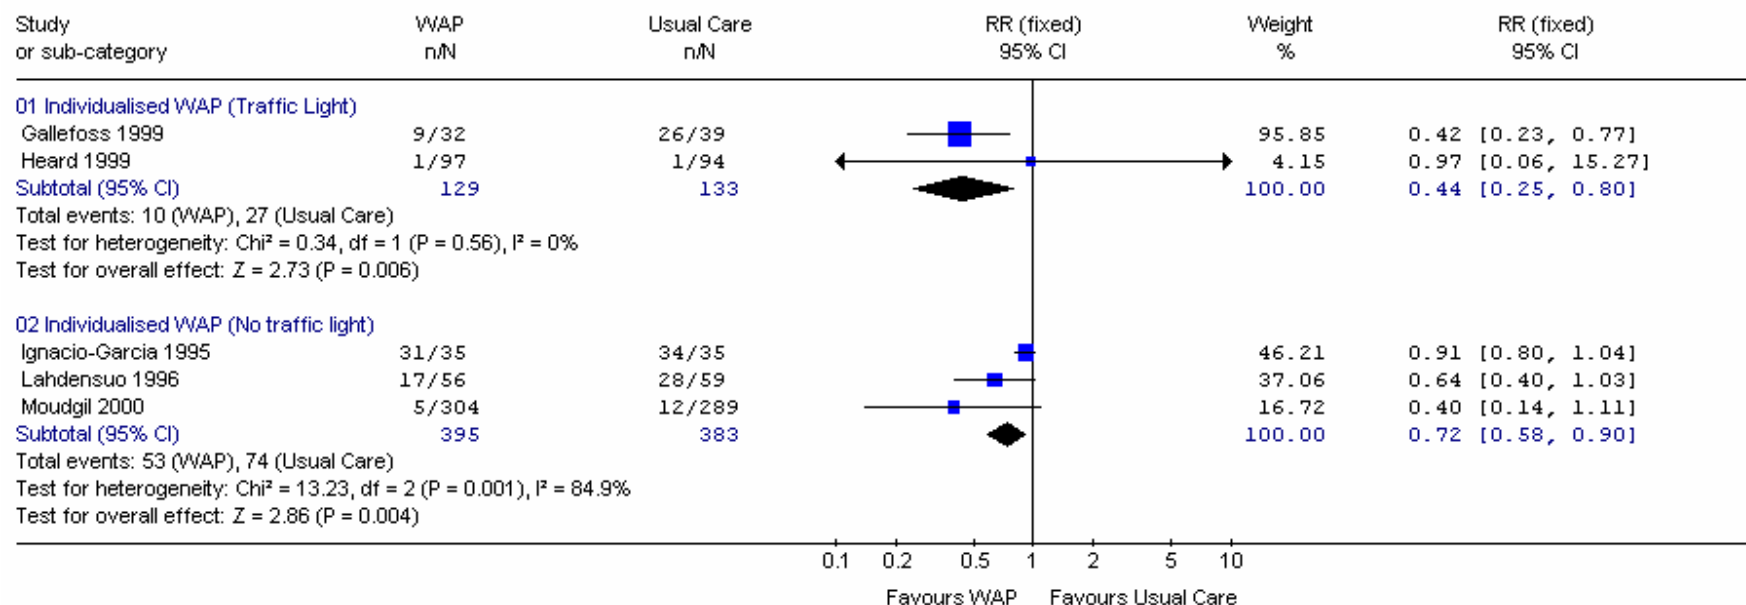

Fig S11: The efficacy of action plan treatments using ICS and OCS based plans on hospitalisations

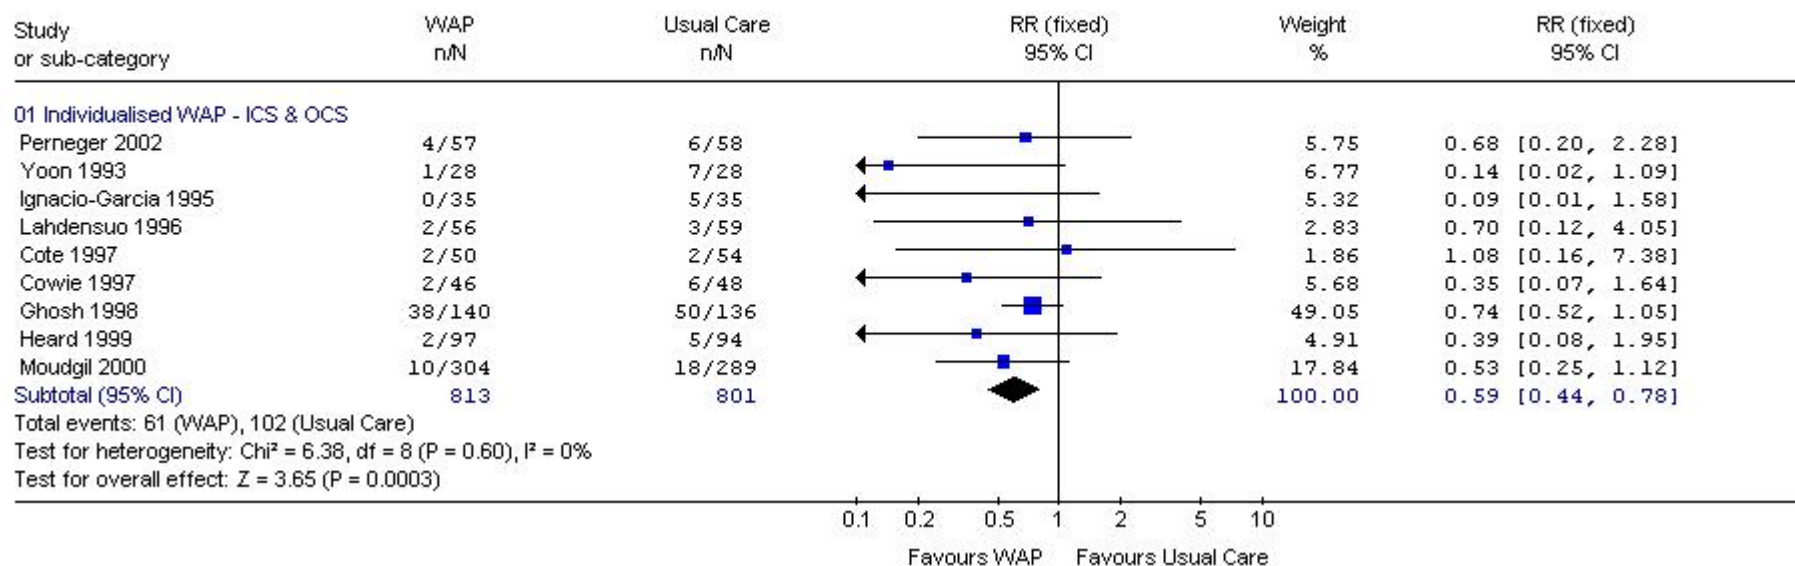

Fig S12: The efficacy of action plan treatments using ICS and OCS based plans on ER Visits

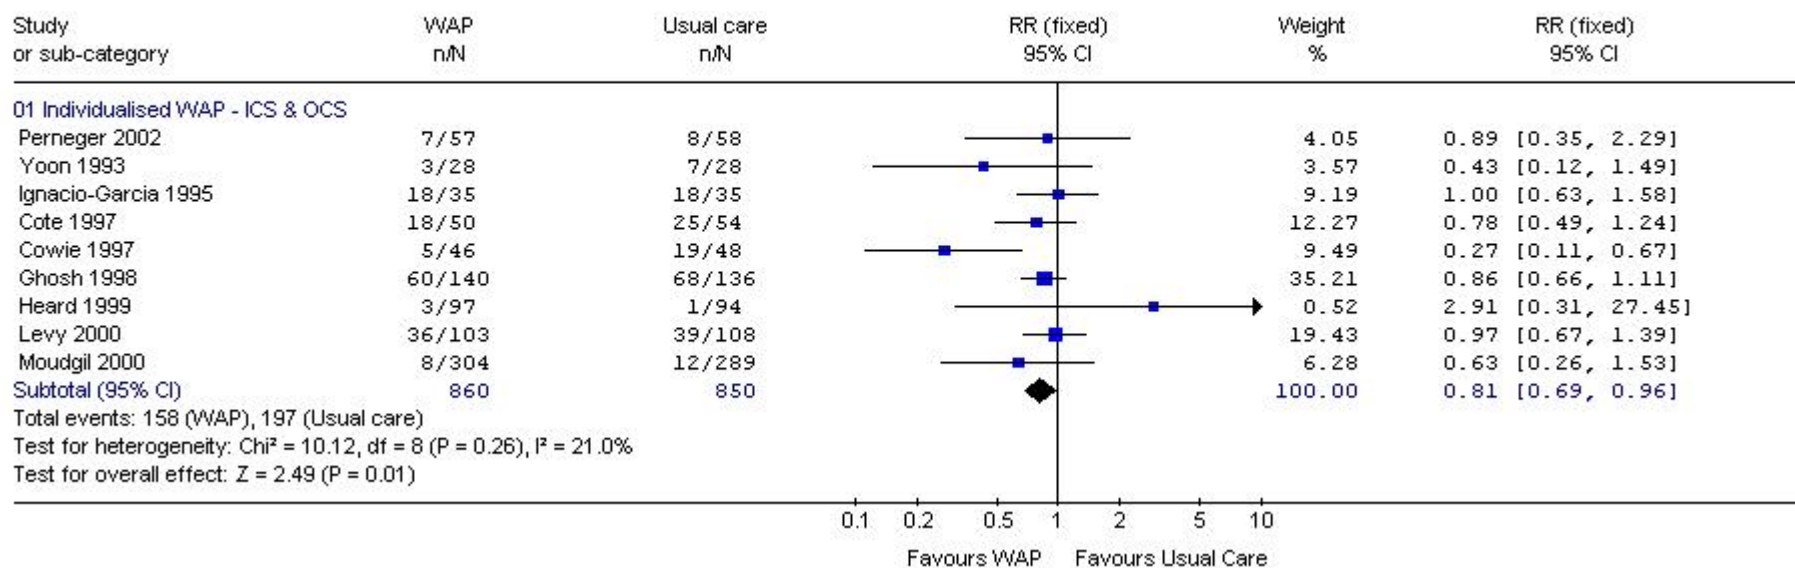

Fig S13: The efficacy of action plan treatments using ICS and OCS based plans on FEV<sub>1</sub> (mean)

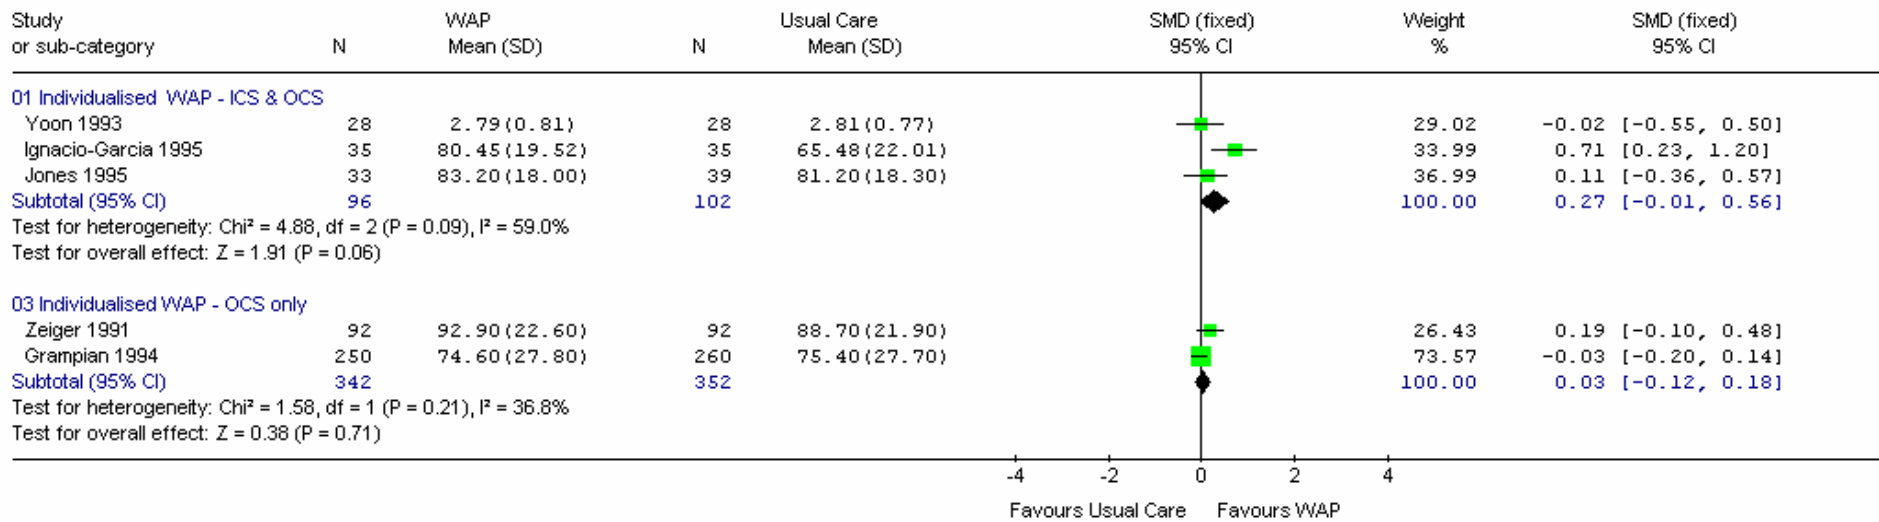

Fig S14: The efficacy of action plan treatments using ICS and OCS based plans on PEF (mean)

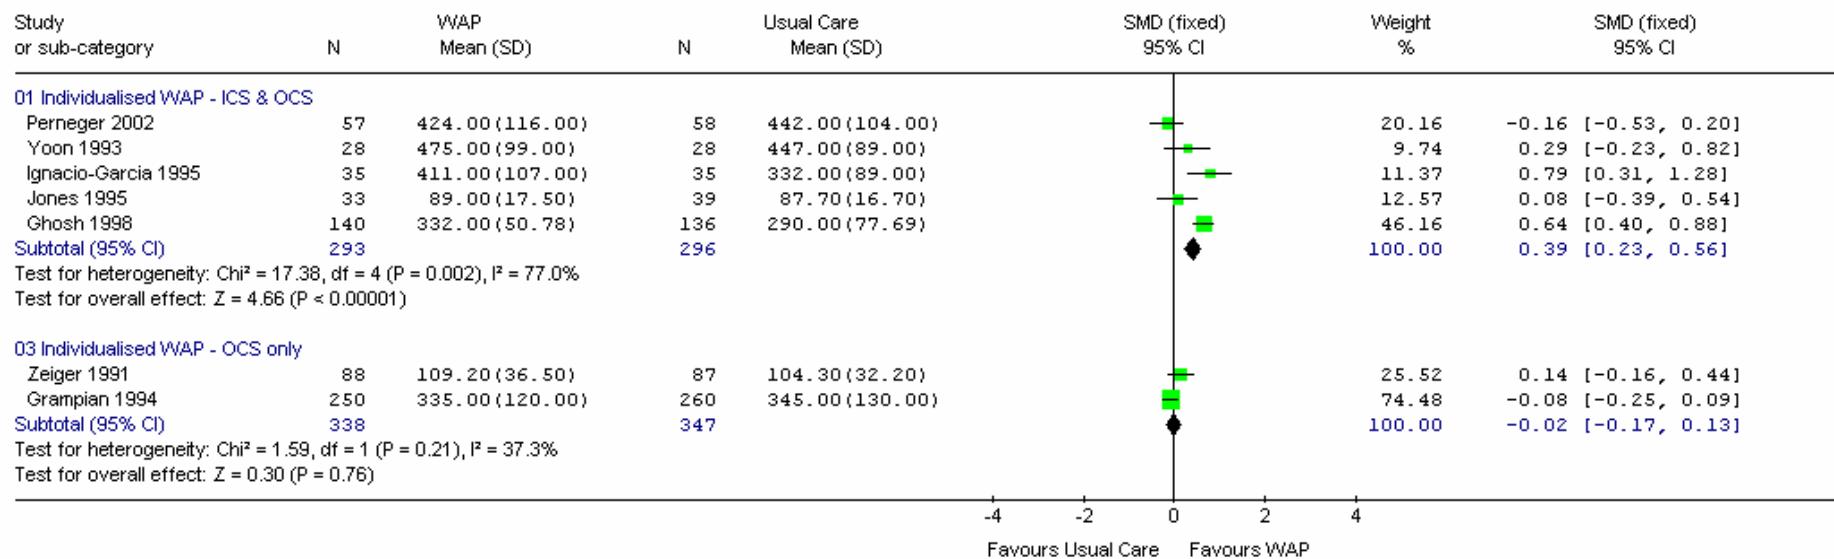

Supplement: 59294Figs1to14.pdf [file 59294Figs1to14.pdf]
